# Supplementary material for: Parkinson’s Disease and Metal Storage Disorders: A Systematic Review
Source: MDPI journal article supplement (doi:10.3390/brainsci8110194), 2018-10-31
Supplement: s1 [file s1]

|                                                       |                       |                             |        |    |                    |    |   |   |                                                                                                         |
|-------------------------------------------------------|-----------------------|-----------------------------|--------|----|--------------------|----|---|---|---------------------------------------------------------------------------------------------------------|
| Scale, T. et al., 2014. [67]                          | Case report           | Fahr Disease                | 1M     | 62 | NA                 | NA |   | ✓ | No response to L-dopa                                                                                   |
| Schneider, S.A. et al., 2010. [12]                    | Case report           | Kufor-syndrome              | 1M     | 16 | Pakistan           | NA |   | ✓ | Associated with dystonia                                                                                |
| Sechi, G. et al., 2007. [43]                          | Case report           | Wilson's Disease            | 3F     | 70 | NA                 | NA | ✓ |   | Very late onset L-dopa responsive parkinsonism                                                          |
| Seo, J.-H., Song, S.-K. & Lee, P.H., 2009. [16]       | Case report           | PKAN                        | 1M     | 35 | NA                 | NA |   | ✓ | No response to L-dopa                                                                                   |
| Song, C.-Y. et al., 2017. [68]                        | Case report           | Pseudohypoparathyroidism    | 1F     | 52 | NA                 | NA |   | ✓ | Very fast disease progression                                                                           |
| Thomas, M., Hayflick, S.J. & Jankovic, J., 2004. [22] | Cross-sectional study | PKAN                        | 14M/8F | 35 | NA                 | NA | ✓ | ✓ | Typical parkinsonism seen, though clinical features not defined. Associated with dystonia in 4/22 pts   |
| Vroegindeweij, L.H.P. et al., 2017. [69]              | Case Series           | Aceruloplasminemia          | 4M/1F  | NA | 4 Dutch, 1 Italian | NA |   | ✓ | Parkinsonian features in all pts. Associated with cognitive decline and cerebellar features in all pts. |
| Williams, S. et al., 2013. [37]                       | Case report           | Hereditary Haemochromatosis | 1F     | 60 | Caucasian          | NA |   | ✓ | Short disease course, early autonomic involvement, no L-dopa response                                   |
| Xie, F. et al., 2015. [29]                            | Case report           | PLAN                        | 2M     | 34 | NA                 | NA | ✓ |   | Typical features, good L-dopa response                                                                  |



|                                                               |                              |                                    |    |    |    |    |   |                                                                                                                     |
|---------------------------------------------------------------|------------------------------|------------------------------------|----|----|----|----|---|---------------------------------------------------------------------------------------------------------------------|
| Nielsen, J.E.,<br>Jensen, L.N. &<br>Krabbe, K.,<br>1995. [34] | Case report                  | Hereditary<br>Haemochr<br>omatosis | 1M | 29 | NA | NA | ✓ | Typical PD features,<br>immediate improvement<br>with L-dopa                                                        |
| Nishioka, K.<br>et al., 2015.<br>[63]                         | Cross-<br>sectional<br>study | BPAN                               | 7F | 32 | NA | NA | ✓ | Cognitive dysfunction as<br>presenting symptom in all 7.<br>Otherwise typical<br>parkinsonism. L-dopa<br>responsive |
| Oder, W. et<br>al.,<br>1991. [42]                             | Cross-<br>sectional<br>study | Wilson's<br>Disease                | NA | NA | NA | NA | ✓ | 8/25 pts with parkinsonian<br>features. Bradykinesia,<br>resting tremor present.                                    |
| Olgiati, S. et<br>al.,<br>2017. [64]                          | Cross-<br>sectional<br>study | MPAN                               | NA | NA | NA | NA | ✓ | 9/15 pts with parkinsonian<br>features. Cognitive<br>impairment and pyramidal<br>signs seen                         |
| Pearson, D.W.<br>et al., 1981.<br>[65]<br>Pestana             | Case report                  | Pseudohy<br>poparathy<br>roidism   | 1M | 58 | NA | NA | ✓ | Typical PD features. Very<br>fast disease progression                                                               |
| Knight, E.M.,<br>Gilman, S. &<br>Selwa, L.,<br>2009. [45]     | Case report                  | Wilson's<br>Disease                | 1M | 55 | NA | NA | ✓ | Typical PD features<br>associated with epilepsy                                                                     |
| Racette, B.A.<br>et al., 2001.<br>[15]                        | Case report                  | PKAN                               | 1F | 60 | NA | NA | ✓ | Bilateral features, no<br>response to L-dopa                                                                        |
| Rohani, M. et<br>al., 2017. [66]                              | Case report                  | Fahr<br>disease                    | 1F | 50 | NA | NA | ✓ | Typical L-dopa responsive<br>parkinsonism                                                                           |
| Rosana, A. &<br>La Rosa, L.,<br>2007. [36]                    | Case report                  | Hereditary<br>Haemochr<br>omatosis | 1M | 58 | NA | NA | ✓ | No response to L-dopa                                                                                               |
| Sakarya, A.,<br>Oncu, B. &<br>Elibol, B.,<br>2012. [19]       | Case report                  | PKAN                               | 1M | 16 | NA | NA | ✓ | Early severe cognitive<br>impairment, bilateral onset,<br>pyramidal features.                                       |



|                                                   |                       |                             |        |    |                                           |    |   |                                                                                                        |
|---------------------------------------------------|-----------------------|-----------------------------|--------|----|-------------------------------------------|----|---|--------------------------------------------------------------------------------------------------------|
| Hayflick, S.J. et al., 2013. [58]                 | Cohort study          | BPAN                        | 3M/18F | 25 | NA                                        | NA | ✓ | Developmental delay, dystonia and parkinsonism.                                                        |
| Hermann, A. et al., 2017. [59]                    | Case report           | BPAN                        | 1F     | 24 | German                                    | NA | ✓ | L-dopa responsive<br>Supranuclear gaze palsy, dystonia and no L-dopa response                          |
| Ichinose, Y. et al., 2014. [60]                   | Case report           | BPAN                        | 1F     | 30 | NA                                        | NA | ✓ | Associated with dystonia                                                                               |
| Kim, Y.J. et al., 2015. [30]                      | Case Series           | PLAN                        | 1M/1F  | 14 | Korean                                    | NA | ✓ | Associated with dystonia in 2/2 pts.                                                                   |
| Klysz, B., Skowronska, M. & Kmiec, T., 2014. [61] | Case report           | MPAN                        | 1F     | 15 | NA                                        | NA | ✓ | Chorea, dystonia and psychological manifestations                                                      |
| Kumar, N. et al., 2016. [33]                      | Case Series           | Hereditary Haemochromatosis | 2M/1F  | 59 | 1 Irish-Portuguese, 1 Scottish, 1 unknown | NA | ✓ | Parkinsonian signs in 3 pts. 1 responded well to L-dopa, one not treated.                              |
| Lee, C.-H. et al., 2013. [17]                     | Case report           | PKAN                        | 2M     | 20 | Taiwanese                                 | NA | ✓ | Typical parkinsonism in 1pt though onset at 18. Bilateral features in the other                        |
| Lee, J.-H. et al., 2016. [14]                     | Cross-sectional study | PKAN                        | 6M     | 36 | NA                                        | NA | ✓ | Poor response to L-dopa in all. Associated with dystonia in 4/6 pts, isolated parkinsonism in 2/6 pts. |
| Mak, C.M. et al., 2011. [18]                      | case report           | PKAN                        | 1M     | 27 | Hong Kong                                 | NA | ✓ | Bilateral features                                                                                     |
| Ni, W. et al., 2016. [62]                         | Case report           | Neuroferritinopathy         | 1F     | 44 | NA                                        | NA | ✓ | No response to L-dopa, pyramidal signs                                                                 |



|                                                         |                       |                             |       |    |           |    |   |   |                                                                                                                                                                    |
|---------------------------------------------------------|-----------------------|-----------------------------|-------|----|-----------|----|---|---|--------------------------------------------------------------------------------------------------------------------------------------------------------------------|
| Di Fonzo, A. et al., 2007. [52]                         | Cross-sectional study | Kufor-Rakeb Syndrome        | 3M    | NA | NA        | NA | ✓ | ✓ | Features of Parkinsonism in all 3pts. Supranuclear gaze palsy and hallucinations/psychotic episodes in 1/3, psychotic episodes in 1/3 and typical features in 1/3. |
| Diaz, N., 2013. [13]                                    | Case report           | PKAN                        | 1F    | NA | NA        | NA |   | ✓ | L-dopa unresponsive, symmetrical features.                                                                                                                         |
| Eiberg, H. et al., 2012. [53]                           | Case report           | Kufor-Rakeb Syndrome        | 1M    | 12 | NA        | NA |   | ✓ | Supranuclear gaze palsy, cognitive impairment and hallucinations                                                                                                   |
| Evans, B.K. & Donley, D.K., 1988. [54]                  | Case report           | Pseudohypoparathyroidism    | 1F    | 20 | NA        | NA |   | ✓ | Rest tremor and bradykinesia with mental retardation                                                                                                               |
| Fekete, R., 2012. [55]                                  | Case report           | NBIA, unknown type          | 1M    | 73 | NA        | NA |   | ✓ | Typical features. Poor L-dopa response but dystonia present upon removal of L-dopa.                                                                                |
| Fonderico, M. et al., 2017. [56]                        | Case report           | BPAN                        | 1F    | 26 | NA        | NA | ✓ |   | Mild typical parkinsonism                                                                                                                                          |
| Gasca-Salas, C. et al., 2017. [44]                      | Case report           | Wilson's Disease            | 1F    | 38 | NA        | NA |   | ✓ | Tremor, clumsiness, rigidity and dystonia in left arm. Good L-dopa response.                                                                                       |
| Giri, A. et al., 2016. [28]                             | Case report           | PLAN                        | 1F    | 27 | NA        | NA | ✓ |   | Typical Features, PD diagnosis                                                                                                                                     |
| Girotra, T., Mahajan, A. & Sidiropoulos, C., 2017. [32] | Case report           | Hereditary Haemochromatosis | 1M    | 41 | Caucasian | NA | ✓ |   | Typical features, mild but clear response to L-dopa                                                                                                                |
| Gondim, F. de A.A. et al., 2014. [41]                   | Case Series           | Wilson's Disease            | 2M/2F | 28 | Brazil    | NA | ✓ |   | 4 pts with typical features, all responded well to L-dopa                                                                                                          |
| Gore, E. et al., 2016. [57]                             | Case report           | MPAN                        | 1M    | 35 | Kuwaiti   | NA |   | ✓ | Early behavioural change,                                                                                                                                          |



| Paper                              | Type of paper                | Condition                          | Male/Female | Average age<br>at Onset of<br>Parkinsonism<br>(years) | Ethnicity                 | Smoking<br>Status | Typical<br>Parkinsonism | Atypical<br>Parkinsonism | Parkinsonism features                                                                                       |
|------------------------------------|------------------------------|------------------------------------|-------------|-------------------------------------------------------|---------------------------|-------------------|-------------------------|--------------------------|-------------------------------------------------------------------------------------------------------------|
| Alberca, R. et al., 1987. [20]     | Case report                  | PKAN                               | 1M/1F       | 27                                                    | NA                        | NA                | ✓                       | ✓                        | Female siblings: Typical features. Male sibling: associated with dystonia. Fast progression.                |
| Batla, A. et al., 2015. [48]       | Case report                  | Neuroferri<br>tinopathy            | 1F          | 79                                                    | NA                        | NA                |                         | ✓                        | Associated with dystonia                                                                                    |
| Behrens, M.I. et al., 2010. [49]   | Case Series                  | Kufor-<br>Rakeb<br>Syndrome        | 4M/1F       | NA                                                    | Chilean                   | NA                |                         | ✓                        | Parkinsonian features in all 5 pts. No tremor present. Supranuclear gaze palsy in 4/5, poor L-dopa response |
| Bozi, M. et al., 2009. [23]        | Case report                  | PKAN                               | 1M          | 15                                                    | NA                        | NA                |                         | ✓                        | Mildly affected but associated with pyramidal signs                                                         |
| Chinnery, P.F. et al., 2007. [50]  | Cross-<br>sectional<br>study | Neuroferri<br>tinopathy            | 3F          | NA                                                    | 2<br>English,<br>1 French | NA                |                         | ✓                        | Associated with dystonia in all 3.                                                                          |
| Costello, D.J. et al., 2004. [31]  | Case report                  | Hereditary<br>Haemochr<br>omatosis | 3M/1F       | 53                                                    | NA                        | NA                | ✓                       |                          | No tremor present. 4 pts all with HH and IPD diagnoses, classical signs. Good L-dopa response               |
| Crosiers, D. et al., 2011. [51]    | case report                  | Kufor-<br>Rakeb<br>syndrome        | 1M          | 10                                                    | Afghan                    | NA                |                         | ✓                        | Associated with dystonia.                                                                                   |
| Czlonkowska, A. et al., 2018. [40] | Cross-<br>sectional<br>study | Wilson's<br>Disease                | NA          | NA                                                    | Polish                    | NA                | ✓                       |                          | Parkinsonism found in 11.3% (6/53pts)                                                                       |
| Darling, A. et al., 2017. [21]     | Cross-<br>sectional<br>study | PKAN                               | 22M/25F     | NA                                                    | NA                        | NA                |                         | ✓                        | Features of Parkinsonism displayed in all 47pts. Associated with Dystonia.                                  |
| Demarquay, G. et al., 2000. [35]   | Case report                  | Hereditary<br>Haemochr<br>omatosis | 2M/1F       | 56                                                    | NA                        | NA                |                         | ✓                        | Bradykinesia and rigidity on left side. Poor L-dopa response                                                |
