# Supplementary material for: Parkinson’s Disease and Metal Storage Disorders: A Systematic Review
Source: MDPI journal article supplement (doi:10.3390/brainsci8110194), 2018-10-31
Supplement: s1 [file s1]

Term A: Parkinson, Parkinson's, Parkinsonism, Parkinsonism.

Term B: Aceruloplasminemia, Acrodermatitis, Bartter disease, BPAN, Calcium metabolism, CoPAN, Copper metabolism, DiGeorge, Fahr, Hemochromatosis, Hereditary rickets, Iron metabolism, Kufo-Rakeb syndrome, Magnesium metabolism, Menkes, Mitochondrial membrane protein-associated neurodegeneration, Neurodegenerative brain iron accumulation, Neuroferritinopathy, PLAN, PLA2G6-associated neurodegeneration, Phosphate metabolism, Pseudohypoparathyroidism, Tumoral calcinosis, Vitamin D metabolism, Wilson, Woodhouse-Sakati syndrome, Zinc metabolism
